# Supplementary material
Source: MDPI journal article supplement (https://www.mdpi.com/2411-9660/6/6/119)
Supplement: s1 [file s1]

Supplementary Materials

# The Relationship between Structural Features of Lignocellulosic Materials and Ethanol Production yield

Mohammad Saber Bay <sup>1,2,\*</sup>, Fatemeh Eslami <sup>2</sup> and Keikhosro Karimi <sup>2,3</sup>

<sup>1</sup> Department of Chemical Engineering, Auburn University, Auburn, AL 36849, USA

<sup>2</sup> Department of Chemical Engineering, Isfahan University of Technology, Isfahan 84156-83111, Iran

<sup>3</sup> Department of Chemical Engineering, Vrije Universiteit Brussel, 1050 Brussels, Belgium

\* Correspondence: mzb0196@auburn.edu; Tel.: +98-3133915623

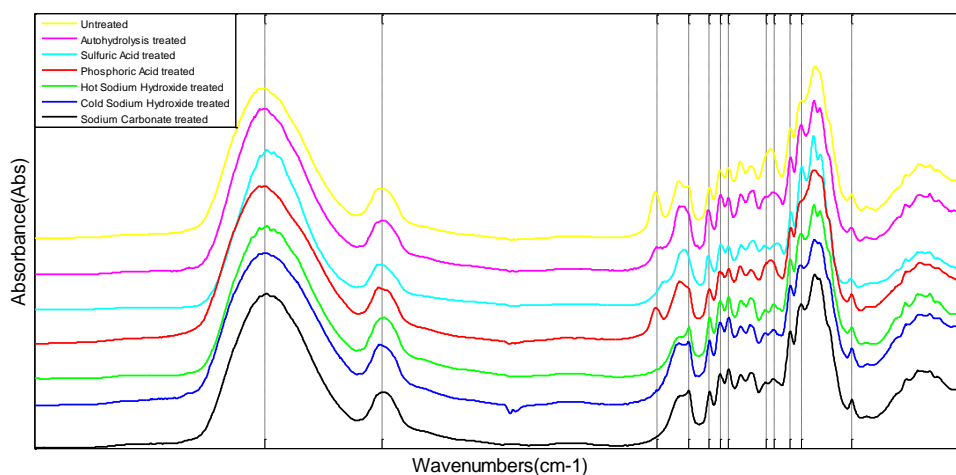

**Figure S1:** FTIR spectra obtained from scanning untreated and pretreated poplar wood

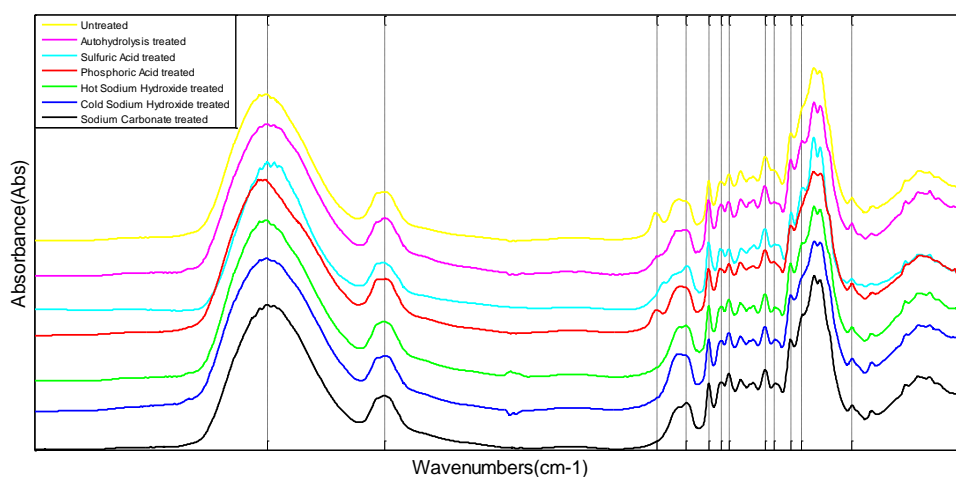

**Figure S2:** FTIR spectra obtained from scanning untreated and pretreated pinewood

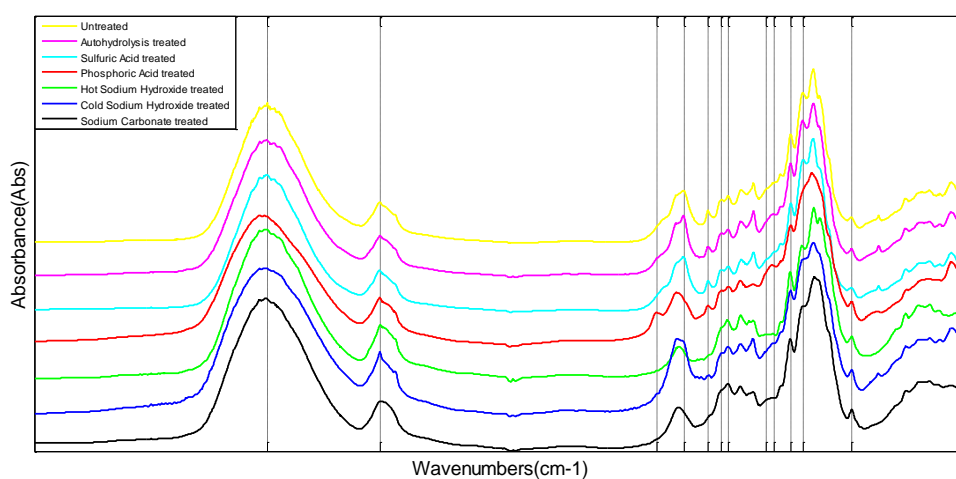

**Figure S3:** FTIR spectra obtained from scanning untreated and pretreated rice straw

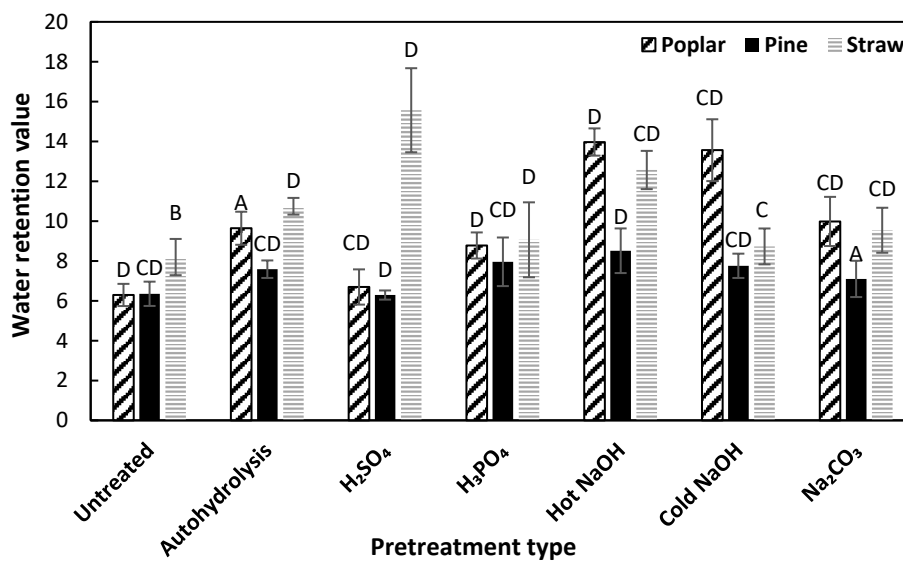

**Figure S4:** Water retention value of untreated and pretreated substrates using nonwoven bags

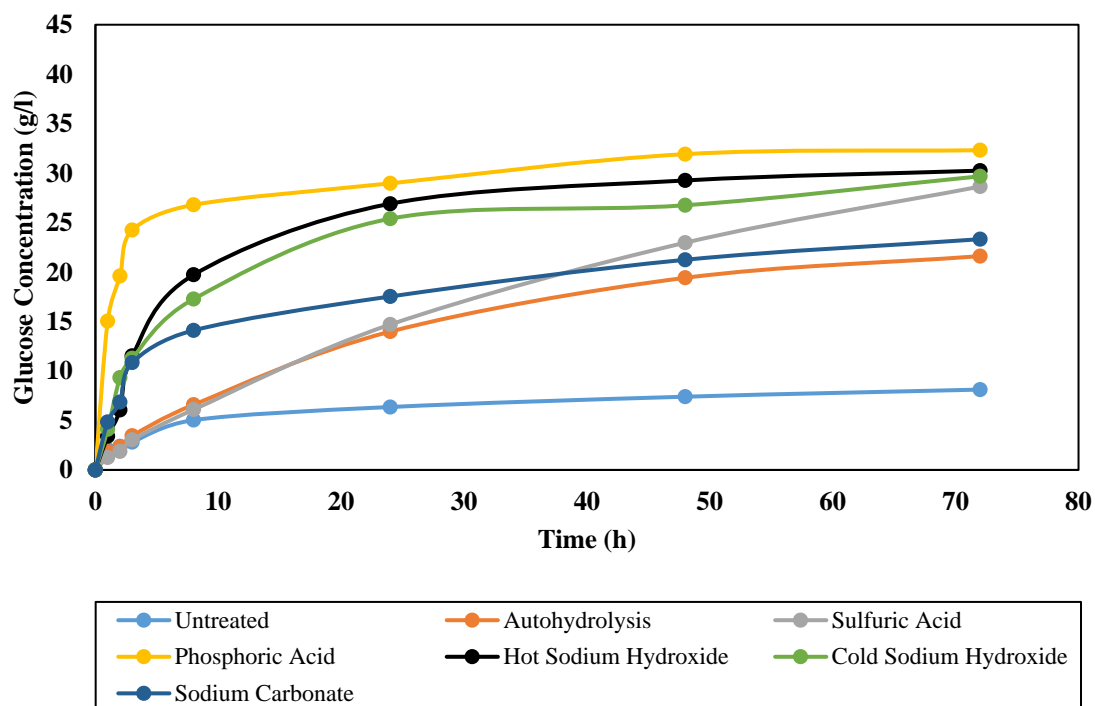

**Figure S5:** Glucose concentration during enzymatic hydrolysis of untreated and pretreated poplar wood

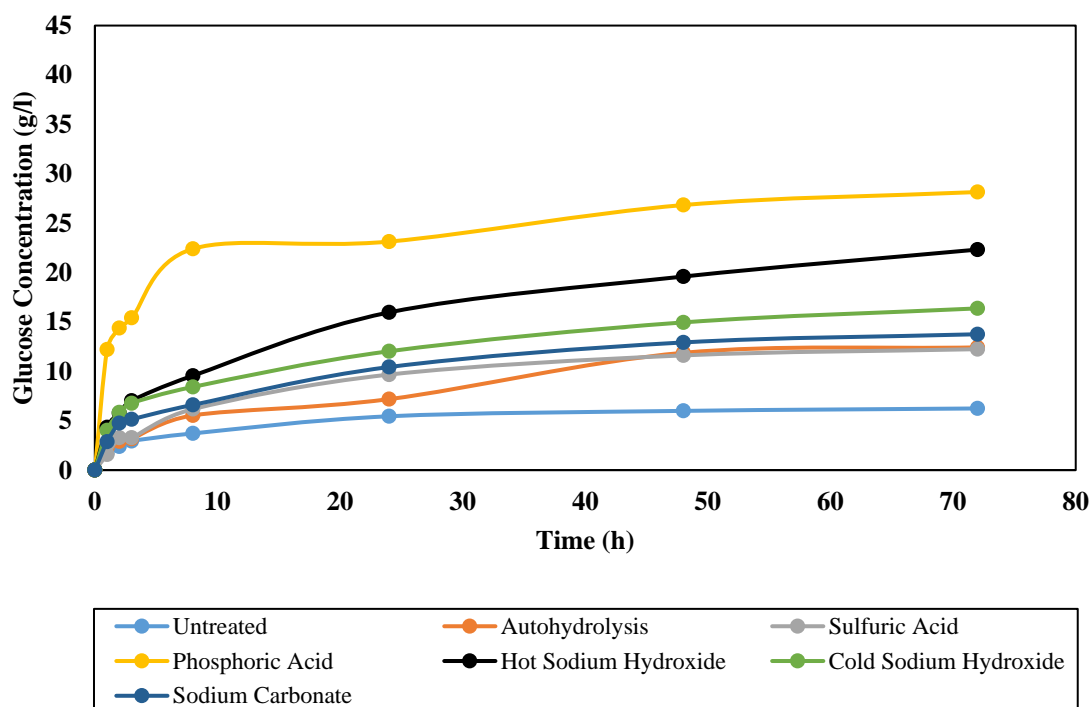

**Figure S6:** Glucose concentration during enzymatic hydrolysis of untreated and pretreated pinewood

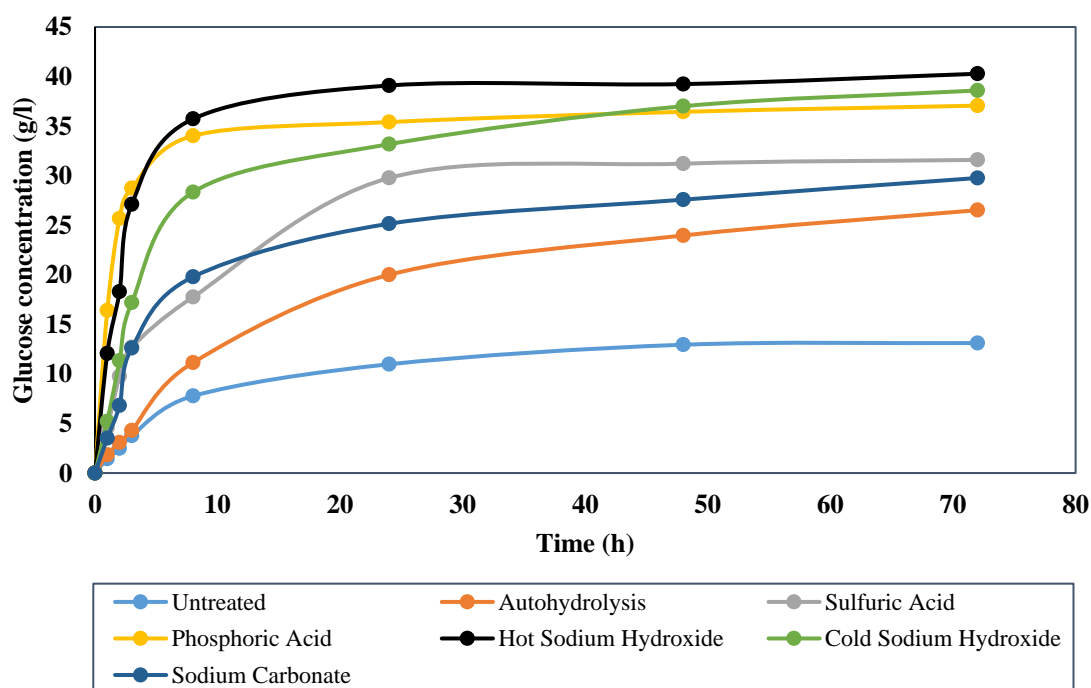

**Figure S7:** Glucose concentration during enzymatic hydrolysis of untreated and pretreated rice straw

**Table S1:** Total solids, volatile solids, and pretreatment recovery percentages of substrates

| Substrate  | Pretreatment Type     | Total Solids (%) | Volatile Solids (%) | Recovery (%) |
|------------|-----------------------|------------------|---------------------|--------------|
| Poplar     | Untreated             | 96.6±0.1         | 96.3±0.4            | -            |
|            | Autohydrolysis        | 96.8±0.3         | 95.3±0.4            | 67.8         |
|            | Sulfuric Acid         | 99.6±0.1         | 98.5±0.3            | 62.2         |
|            | Phosphoric Acid       | 98.4±0.5         | 97.7±0.7            | 76.3         |
|            | Hot Sodium Hydroxide  | 97.1±0.6         | 97.7±0.5            | 56.5         |
|            | Cold Sodium Hydroxide | 96.6±0.5         | 96.8±0.4            | 77.4         |
|            | Sodium Carbonate      | 96.7±0.2         | 95.9±0.6            | 76.0         |
| Pine       | Untreated             | 97.5±0.2         | 97.2±0.6            | -            |
|            | Autohydrolysis        | 97.2±0.00        | 98.3±0.1            | 71.4         |
|            | Sulfuric Acid         | 98.7±0.3         | 99.0±0.7            | 61.8         |
|            | Phosphoric Acid       | 98.8±1.0         | 96.7±0.1            | 79.3         |
|            | Hot Sodium Hydroxide  | 97.2±0.2         | 96.5±0.2            | 76.2         |
|            | Cold Sodium Hydroxide | 97.6±0.0         | 96.8±0.1            | 93.6         |
|            | Sodium Carbonate      | 95.9±0.2         | 94.5±0.1            | 84.8         |
| Rice Straw | Untreated             | 95.8±0.2         | 88.6±0.3            | -            |
|            | Autohydrolysis        | 97.3±0.0         | 91.2±0.1            | 57.5         |
|            | Sulfuric Acid         | 97.8±0.5         | 81.8±0.3            | 51.1         |
|            | Phosphoric Acid       | 98.2±0.2         | 85.8±0.5            | 66.6         |
|            | Hot Sodium Hydroxide  | 97.9±0.2         | 91.0±0.3            | 33.2         |
|            | Cold Sodium Hydroxide | 96.8±0.6         | 85.9±0.8            | 66.6         |
|            | Sodium Carbonate      | 96.5±0.1         | 87.7±0.1            | 59.3         |

**Table S2:** Relative change in adsorption at different wavenumbers after pretreating poplar wood

| Band position | Assignment                                                                                                                   | Pretreatment |                                |                                |          |           |                                 |
|---------------|------------------------------------------------------------------------------------------------------------------------------|--------------|--------------------------------|--------------------------------|----------|-----------|---------------------------------|
|               |                                                                                                                              | Au*          | H <sub>2</sub> SO <sub>4</sub> | H <sub>3</sub> PO <sub>4</sub> | Hot NaOH | Cold NaOH | Na <sub>2</sub> CO <sub>3</sub> |
| 896           | Asym., out of phase ring stretching<br>Cellulose II (895)<br>Amorphous Cellulose (895)<br>Xylan (899)                        | 0.03         | -0.34                          | 0.09                           | 0.13     | 0.43      | 0.06                            |
| 1111          | Ring asymmetric stretching<br>Cellulose I (1111)                                                                             | 0.07         | 0.02                           | -                              | 0.04     | 0.07      | 0.04                            |
| 1160          | C-O-C asymmetric stretching<br>Cellulose I (1155)<br>Cellulose II (1162)                                                     | 0.04         | -0.12                          | 0.04                           | 0.07     | 0.14      | 0.05                            |
| 1230          | C-O stretching<br>Lignin and hemicellulose (1235)                                                                            | -0.10        | -0.28                          | -0.08                          | -0.18    | -0.08     | -0.24                           |
| 1265          | Guaiacyl rings vibrating (1270)                                                                                              | -0.15        | -0.30                          | -                              | -0.25    | -0.12     | -0.28                           |
| 1425          | C-H <sub>2</sub> symmetric bending<br>Cellulose I (1431)                                                                     | 0.06         | -0.13                          | 0.03                           | 0.13     | 0.32      | 0.09                            |
| 1459          | -OH in plane bending<br>Cellulose I (1455)<br>Cellulose II (1470)<br>Asymmetric bending in C-H <sub>3</sub><br>Lignin (1465) | 0.14         | -0.07                          | 0.04                           | 0.11     | 0.30      | 0.06                            |
| 1507          | C-C stretching of the aromatic ring<br>Lignin (1510)                                                                         | 0.24         | 0.03                           | 0.04                           | 0.17     | 0.40      | 0.08                            |
| 1595          | C=C<br>Lignin (1595)                                                                                                         | 0.27         | 0.12                           | -                              | -0.04    | 0.33      | 0.07                            |
| 1732          | C=O stretching of acetyl/carboxylic acid/esters/carbonyl<br>Hemicellulose and lignin (1720-1745)                             | -0.43        | -                              | -0.24                          | -        | -0.52     | -                               |
| 2910          | C-H stretching<br>Cellulose I (2900)<br>Cellulose II (2900)                                                                  | 0.06         | -0.13                          | 0.10                           | 0.19     | 0.35      | 0.10                            |
| 3413          | -OH stretching intramolecular hydrogen bonds<br>Cellulose I (3352)<br>Cellulose II (3447)                                    | 0.09         | 0.05                           | 0.04                           | 0.01     | 0.06      | 0.02                            |

\*Au: Autohydrolysis

**Table S3:** Relative change in adsorption at different wavenumbers after pretreating pine wood

| Band position | Assignment                                               | Pretreatment |                                |                                |          |           |                                 |
|---------------|----------------------------------------------------------|--------------|--------------------------------|--------------------------------|----------|-----------|---------------------------------|
|               |                                                          | Au*          | H <sub>2</sub> SO <sub>4</sub> | H <sub>3</sub> PO <sub>4</sub> | Hot NaOH | Cold NaOH | Na <sub>2</sub> CO <sub>3</sub> |
| 896           | Asym., out of phase ring stretching                      |              |                                |                                |          |           |                                 |
|               | Cellulose II (895)                                       | 0.21         | -0.26                          | 0.42                           | 0.23     | 0.30      | 0.02                            |
|               | Amorphous Cellulose (895)                                |              |                                |                                |          |           |                                 |
|               | Xylan (899)                                              |              |                                |                                |          |           |                                 |
| 1159          | C-O-C asymmetric stretching                              |              |                                |                                |          |           |                                 |
|               | Cellulose I (1155)                                       | 0.07         | -0.09                          | 0.11                           | 0.08     | 0.11      | 0.02                            |
|               | Cellulose II (1162)                                      |              |                                |                                |          |           |                                 |
| 1230          | C-O stretching                                           | 0.04         | -0.07                          | 0.17                           | 0.02     | 0.06      | -0.07                           |
|               | Lignin and hemicellulose (1235)                          |              |                                |                                |          |           |                                 |
| 1267          | Guaiacyl rings vibrating (1270)                          | 0.06         | -0.04                          | 0.12                           | 0.01     | 0.04      | -0.05                           |
| 1423          | C-H <sub>2</sub> symmetric bending                       | 0.11         | -0.08                          | 0.21                           | 0.20     | 0.23      | 0.14                            |
|               | Cellulose I (1431)                                       |              |                                |                                |          |           |                                 |
| 1455          | -OH in plane bending                                     |              |                                |                                |          |           |                                 |
|               | Cellulose I (1455)                                       |              |                                |                                |          |           |                                 |
|               | Cellulose II (1470)                                      | 0.20         | 0.03                           | 0.28                           | 0.24     | 0.25      | 0.13                            |
|               | Asymmetric bending in C-H <sub>3</sub>                   |              |                                |                                |          |           |                                 |
|               | Lignin (1465)                                            |              |                                |                                |          |           |                                 |
| 1510          | C-C stretching of the aromatic ring                      | 0.27         | 0.14                           | 0.28                           | 0.23     | 0.25      | 0.10                            |
|               | Lignin (1510)                                            |              |                                |                                |          |           |                                 |
| 1606          | C=C                                                      | 0.15         | 0.11                           | -                              | 0.35     | -         | 0.16                            |
|               | Lignin (1595)                                            |              |                                |                                |          |           |                                 |
| 1732          | C=O stretching of acetyl/carboxylic acid/esters/carbonyl | -0.31        | -                              | -                              | -        | -         | -                               |
|               | Hemicellulose and lignin (1720-1745)                     |              |                                |                                |          |           |                                 |
| 2900          | C-H stretching                                           |              |                                |                                |          |           |                                 |
|               | Cellulose I (2900)                                       | 0.17         | -0.02                          | 0.35                           | 0.19     | 0.20      | 0.09                            |
|               | Cellulose II (2900)                                      |              |                                |                                |          |           |                                 |
| 3400          | -OH stretching intramolecular hydrogen bonds             |              |                                |                                |          |           |                                 |
|               | Cellulose I (3352)                                       | 0.03         | 0.01                           | 0.08                           | 0.09     | 0.06      | -0.01                           |
|               | Cellulose II (3447)                                      |              |                                |                                |          |           |                                 |

\*Au: Autohydrolysis

**Table S4:** Relative change in adsorption at different wavenumbers after pretreating rice straw

| Band position | Assignment                                                                                                                   | Pretreatment |                                |                                |          |           |                                 |
|---------------|------------------------------------------------------------------------------------------------------------------------------|--------------|--------------------------------|--------------------------------|----------|-----------|---------------------------------|
|               |                                                                                                                              | Au*          | H <sub>2</sub> SO <sub>4</sub> | H <sub>3</sub> PO <sub>4</sub> | Hot NaOH | Cold NaOH | Na <sub>2</sub> CO <sub>3</sub> |
| 898           | Asym., out of phase ring stretching<br>Cellulose II (895)<br>Amorphous Cellulose (895)<br>Xylan (899)                        | 0.12         | -0.02                          | 0.78                           | 0.78     | 0.83      | 0.65                            |
| 1106          | Ring asymmetric stretching<br>Cellulose I (1111)                                                                             | 0.05         | 0.02                           | -                              | -0.09    | -         | -0.03                           |
| 1159          | C-O-C asymmetric stretching<br>Cellulose I (1155)<br>Cellulose II (1162)                                                     | 0.05         | 0.00                           | 0.12                           | 0.01     | 0.16      | 0.03                            |
| 1427          | C-H <sub>2</sub> symmetric bending<br>Cellulose I (1431)                                                                     | 0.03         | -0.01                          | 0.29                           | 0.32     | 0.50      | 0.45                            |
| 1454          | -OH in plane bending<br>Cellulose I (1455)<br>Cellulose II (1470)<br>Asymmetric bending in C-H <sub>3</sub><br>Lignin (1465) | 0.03         | -0.02                          | 0.31                           | -        | 0.48      | -                               |
| 1511          | C-C stretching of the aromatic ring<br>Lignin (1510)                                                                         | -<br>0.05    | -0.03                          | 0.29                           | -0.15    | 0.29      | -                               |
| 1616          | C=C<br>Lignin (1595)                                                                                                         | 0.18         | 0.06                           | -                              | -        | 0.45      | -                               |
| 2919          | C-H stretching<br>Cellulose I (2900)<br>Cellulose II (2900)                                                                  | 0.02         | 0.03                           | 0.21                           | 0.40     | 0.58      | 0.24                            |
| 3400          | -OH stretching intramolecular<br>hydrogen bonds<br>Cellulose I (3352)<br>Cellulose II (3447)                                 | -<br>0.01    | -0.02                          | -0.6                           | 0.09     | 0.06      | 0.09                            |

\*Au: Autohydrolysis



**Table S5:** The percentage of glucan, hemicellulose, and lignin content of poplar wood, pine wood, and rice straw

| Substrate  | Pretreatment Type     | Glucan (%) | Hemicellulosic sugar (%) | Lignin (%) | Lignin and hemicellulose removal (%) |
|------------|-----------------------|------------|--------------------------|------------|--------------------------------------|
| Poplar     | Untreated             | 51.4       | 24.6                     | 25.1       | -                                    |
|            | Autohydrolysis        | 57.8       | 12.9                     | 27.8       | 8.9                                  |
|            | Sulfuric Acid         | 64.1       | 6.6                      | 32.9       | 10.1                                 |
|            | Phosphoric Acid       | 61.2       | 8.0                      | 23.0       | 18.7                                 |
|            | Hot Sodium Hydroxide  | 65.3       | 13.0                     | 23.2       | 13.4                                 |
|            | Cold Sodium Hydroxide | 55.4       | 13.7                     | 23.8       | 12.2                                 |
|            | Sodium Carbonate      | 52.0       | 14.0                     | 23.3       | 12.4                                 |
|            | Untreated             | 44.2       | 19.1                     | 23.1       | -                                    |
| Pine       | Autohydrolysis        | 51.8       | 9.4                      | 21.9       | 10.9                                 |
|            | Sulfuric Acid         | 52.7       | 7.0                      | 29.2       | 6.0                                  |
|            | Phosphoric Acid       | 47.4       | 8.0                      | 27.4       | 6.9                                  |
|            | Hot Sodium Hydroxide  | 47.0       | 12.5                     | 25.5       | 4.2                                  |
|            | Cold Sodium Hydroxide | 45.9       | 12.7                     | 22.4       | 7.1                                  |
|            | Sodium Carbonate      | 48.6       | 11.4                     | 27.9       | 2.9                                  |
|            | Untreated             | 41.8       | 21.9                     | 20.0       | -                                    |
|            | Autohydrolysis        | 52.7       | 13.2                     | 18.4       | 10.3                                 |
| Rice Straw | Sulfuric Acid         | 59.8       | 7.1                      | 19.4       | 15.4                                 |
|            | Phosphoric Acid       | 63.0       | 8.5                      | 19.4       | 14.0                                 |
|            | Hot Sodium Hydroxide  | 71.2       | 11.1                     | 9.7        | 21.0                                 |
|            | Cold Sodium Hydroxide | 60.5       | 12.8                     | 15.3       | 13.8                                 |
|            | Sodium Carbonate      | 57.8       | 14.2                     | 10.7       | 17.0                                 |
|            | Untreated             | 41.8       | 21.9                     | 20.0       | -                                    |
|            | Autohydrolysis        | 52.7       | 13.2                     | 18.4       | 10.3                                 |
|            | Sulfuric Acid         | 59.8       | 7.1                      | 19.4       | 15.4                                 |
